# Supplementary material
Source: PubMed Central journal article supplement (PMC5899497)
Supplement: pnas.1802691115.sapp.pdf [file pnas.1802691115.sapp.pdf]

## Supporting Information (SI Appendix)

### **Inhibition of Enhancer of zeste homolog 2 (EZH2) induces natural killer cell-mediated eradication of hepatocellular carcinoma cells**

Suresh Bugide<sup>a</sup>, Michael R. Green<sup>b,c,1</sup>, and Narendra Wajapeyee<sup>a,1</sup>

<sup>a</sup>Department of Pathology, Yale University School of Medicine, New Haven, CT, 06510

<sup>b</sup>Department of Molecular, Cell and Cancer Biology, University of Massachusetts Medical School, Worcester, MA, 01605

<sup>c</sup>Howard Hughes Medical Institute, University of Massachusetts Medical School, Worcester, MA, 01605

<sup>1</sup>To whom correspondence should be addressed:

Narendra Wajapeyee

Department of Pathology, 310 Cedar Street, Room 315A, Yale University School of Medicine, New Haven, CT 06510, USA. Tel: (203)-737-5070

Email: Narendra.Wajapeyee@yale.edu

Michael R. Green

Department of Molecular, Cell and Cancer Biology, University of Massachusetts Medical School, 364 Plantation Street, Room 628, Worcester, MA 01605, USA. Tel: (508)-856-5331

Email: Michael.Green@umassmed.edu

## SI Materials and Methods

**LDH cytotoxic assay.** The LDH cytotoxicity assay was performed using the LDH cytotoxicity assay kit from Thermo Fisher Scientific (cat. no. 88953), as previously described (1). NK92MI cells ( $2 \times 10^6$  cells/ml; 100  $\mu$ L) served as effector cells and were incubated with different HCC cell lines ( $10 \times 10^3$ ) cells in an effector to target ratio of 20:1 in 96-well tissue culture plates. The plates were incubated at 37°C in a CO<sub>2</sub> incubator for 2 hrs. After incubation, the 96-well tissue culture plates were centrifuged at 1000 rpm for 3 min. The supernatants were then collected from each well into a fresh 96-well plate and 50  $\mu$ L of LDH substrate mixture was added to each well. The plate was incubated for 10–20 min at room temperature in the dark and absorbance at 490 nm and 680 nm was measured using an ELISA plate reader. The absorbance at 680 nm was subtracted from the absorbance at 490 nm to calculate the percent (%) cytotoxicity using the formula below:

$$\frac{\text{LDH experimental} - \text{LDH effector cells} - \text{LDH spontaneous}}{\text{LDH maximal} - \text{LDH spontaneous}} \times 100$$

**Calcein AM cytotoxicity assay.** A Calcein AM cytotoxicity assay was performed as previously described (2). To stain the HCC cells, 1  $\mu$ M of Calcein AM (cat. no. C1359, Sigma-Aldrich) was added to cells in DMEM ( $1 \times 10^5$  cells/ml) and the cells were incubated for 30 min at room temperature. The HCC cells were washed twice with 1 $\times$  PBS and re-suspended in complete DMEM medium at a concentration of  $1 \times 10^5$  cells/ml. The NK92MI cells were plated in triplicate in 96-microwell plates at a concentration of  $1 \times 10^6$  cells/ml to achieve a 1:10 ratio. The plates were incubated at 37°C in CO<sub>2</sub> for 4 hrs. After incubation, fluorescent images of the cells

were captured using a microscope (Olympus). For complete cell lysis, the HCC cells were incubated with 20  $\mu$ l of 10 $\times$  lysis buffer for 1 hr at 37°C.

**Chemical genetics screen using small molecule inhibitors targeting specific epigenetic regulators.** To identify the modulators of NK cell ligand expression on HCC cells, 32 different small molecule inhibitors obtained from Structural Genomics Consortium (SGC) were tested. All of the inhibitors were dissolved in DMSO to prepare 10 mM stocks. The inhibitors and their targets are listed in the SI Appendix, Table S2. Additionally, the EZH2 inhibitor GSK126 was purchased from MedChem Express (cat.no. HY-13470), which was also dissolved in DMSO and prepared as a 10 mM stock solution. SK-HEP-1 cells ( $3 \times 10^6$ ) were seeded in 6-well plates and treated with different doses of small molecule inhibitors (listed in **SI Appendix, Table S2**) or DMSO as a control. After 48 hrs of treatment with the inhibitors, the cells were either harvested in TRIzol® reagent for analyzing the expression of NK cell ligands or used for NK cell cytotoxicity assays.

Based on their effect on the re-expression of at least seven or more NK cell ligands in the primary screen using SK-HEP-1 cells and the HCC patient data samples indicating the alteration of these epigenetic regulators in HCC, we selected six inhibitors for follow-up studies. The six inhibitors, which were against the epigenetic regulators EZH2, SMYD2, BRPF1/2/3, and BAZ2A/B proteins, were further tested in another HCC cell line PLC-PRF-5. PLC/PRF/5 cells ( $3 \times 10^6$ ) were seeded in 6-well plates and treated with EZH2, SMYD2, BRPF1/2/3, or BAZ2A/B inhibitors or DMSO vehicle control. After 48 hrs of treatment with the inhibitors, the cells were harvested in TRIzol® reagent to analyze the expression of the NK cell ligands.

**NK cell cytotoxicity assay using EZH2 shRNAs or EZH2 inhibitor.** SK-HEP-1 or PLC/PRF/5 cells expressing *EZH2* shRNAs or a non-specific shRNA as a negative control were analyzed for NK cell-mediated cytotoxicity using LDH or Calcein AM, as described. For similar experiments with the EZH2 inhibitor, SK-HEP-1 and PLC/PRF/5 cells were treated with the EZH2 inhibitors GSK343 and GSK126 at the concentrations of 3  $\mu$ M or 2  $\mu$ M, respectively, for 48 hrs. After treatment, the cells were analyzed for NK cell-mediated cytotoxicity using LDH or Calcein AM, as described.

Similarly, SK-HEP-1 or PLC/PRF/5 cells expressing *ULBP1*, *MICA*, or *MICB* shRNAs or a non-specific shRNA as a negative control were treated with either DMSO or 3  $\mu$ M GSK343 and analyzed for NK cell-mediated cytotoxicity using an LDH-based method.

**Chromatin Immunoprecipitation.** Chromatin immunoprecipitation (ChIP) was performed as previously described (3). Briefly, a ChIP assay was performed in SK-HEP-1 and PLC/PRF/5 cells using the Simple ChIP Enzymatic Chromatin IP kit (cat.no. 9002S, Cell Signaling) according to the manufacturer's protocol. The lysates were diluted in the ChIP buffer containing protease inhibitor cocktail (Roche), and the samples were incubated with antibodies against EZH2, trimethyl H3K27, DNMT1, DNMT3a (Active Motif, CA, USA), or control IgG (Cell Signaling), followed by immobilization on protein A/G agarose beads (Life Technologies). The chromatin was eluted, and DNA was extracted using DNA purification columns. Quantitative PCR (qPCR) was performed using *ULBP1* and *MICA* promoter-specific primers. Relative fold-change was calculated as the ratio of immunoprecipitated DNA to IgG. The primer sequences and antibodies used for the ChIP assays are listed in SI Appendix, Table S5.

**5Aza2dC and TSA treatment.** SK-HEP-1 and PLC/PRF/5 cells were treated with 5  $\mu$ M 5-Aza-2-deoxyCytidine (5Aza2dC) demethylating agent for 3 days followed by 1  $\mu$ M Trichostatin A (TSA) for 12 hrs. Post 5Aza2dC /TSA treatment, the cells were either harvested in TRIzol® for total RNA isolation or lysed in IP lysis buffer to evaluate the expression of the ULBP1 and MICA ligands by western blotting.

**Methylated DNA Immunoprecipitation (MeDIP).** SK-HEP-1 and PLC/PRF/5 cells were treated with azacytidine (5Aza2dC) and TSA or the EZH2 inhibitor GSK343 or DMSO. Post treatment, DNA was extracted from the cells using a DNeasy Blood & Tissue kit (Qiagen). The extracted DNA was sonicated (Qsonica) for 15 30-second pulses (60% amplitude) with a 45-second pause between each pulse. The sonicated DNA (1  $\mu$ g) from each sample was used for MeDIP analysis with the MeDIP kit (cat.no. 55009, Active Motif) according to the manufacturer's protocol. The samples were incubated with antibodies against 5-methylcytosine or control IgG, followed by immobilization on Protein G magnetic beads. The chromatin was eluted, and the DNA was extracted using DNA purification columns (Qiagen). Quantitative PCR was performed using *ULBP1* promoter-specific primers. The relative fold-enrichment was calculated as the ratio of immunoprecipitated DNA to IgG. The primer sequences used for the MeDIP assay are listed in SI Appendix, Table S5.

**Isolation of mRNA and RT-qPCR analysis.** Total RNA was extracted with TRIzol® (Invitrogen) and purified with RNeasy mini columns (Qiagen) for the mRNA expression analyses. The cDNA was generated using the M-MuLV first-strand cDNA synthesis kit (New England Biolabs) according to the manufacturer's instructions. Quantitative reverse transcription

polymerase chain reaction (RT-qPCR) was performed using the Power SYBR® Green kit (Applied Biosystems) according to the manufacturer's instructions. Actin was used as an internal control. Primer sequences used in the study are provided in SI Appendix, Table 5.

**Preparation of the shRNA lentivirus and generation of stable cell lines.** Gene specific lentiviral shRNAs were obtained from the Open Biosystems. The catalogue numbers for the shRNAs are provided in SI Appendix, **Table S5**. For the lentivirus production, shRNAs were transfected into 293T cells along with the PDM2.G and psPAX2 packaging plasmids using Effectene Transfection Reagent (Qiagen) per the manufacturer's instructions. After 48 hrs, the lentivirus-containing supernatants were harvested, filtered, and used for infections. Lentiviral shRNA-infected HepG2/C3A cells were selected using 1.5 µg/ml of puromycin and the PLC/PRF/5 and SK-HEP-1 cells were selected using 0.75 µg/ml of puromycin.

#### **Cloning and expression of *ULBP1*, *ULPB2*, *ULBP5*, and *ULBP6***

*ULBP1*, 2, 5, and 6 were PCR amplified using HepG2/C3A cDNA as a template and the primers listed in SI Appendix, Table S5. The amplified fragments were digested with the Xba1 and Xho1 restriction enzymes and ligated into the FG12 vector. Lentiviral particles were generated from the FG12 vector and the *ULBP1*, 2, 5, and 6 plasmids as described in the previous section. The SK-HEP-1 cells were infected with FG12 lentiviral particles or lentiviral particles generated from vectors expressing *ULBP1*, 2, 5, and 6. The infected SK-HEP-1 cells were selected using 0.75 µg/ml of puromycin.

#### **SDS-PAGE and Immunoblotting analysis**

The cells were lysed using IP lysis buffer (Pierce) containing protease inhibitor cocktail (Roche, Basel, Switzerland). The cell lysates were centrifuged at 10,000 rpm for 10 min. The total protein concentration was estimated using the Bradford assay (Bio-Rad) and an equal amount of protein was subjected to SDS-PAGE. After transferring the proteins to polyvinylidene fluoride (PVDF) membranes, the membranes were blocked with 5% non-fat milk prior to treatment with antibodies at 4°C overnight, followed by three 15 min washes with 1× TBST. After incubation with a secondary antibody, the membrane signals were detected using the SuperSignal West Pico Chemiluminescent Substrate kit (Thermo Fisher Scientific) or the SuperSignal West Femto Chemiluminescent Substrate kit (Thermo Fisher Scientific). The antibodies used for this study are listed in SI Appendix, Table S5.

## SI References

1. Jurisic V, Spuzic I, & Konjevic G (1999) A comparison of the NK cell cytotoxicity with effects of TNF-alpha against K-562 cells, determined by LDH release assay. *Cancer Lett* 138(1-2):67-72.
2. Somanchi SS, McCulley KJ, Somanchi A, Chan LL, & Lee DA (2015) A Novel Method for Assessment of Natural Killer Cell Cytotoxicity Using Image Cytometry. *PLoS One* 10(10):e0141074.
3. Gazin C, Wajapeyee N, Gobeil S, Virbasius CM, & Green MR (2007) An elaborate pathway required for Ras-mediated epigenetic silencing. *Nature* 449(7165):1073-1077.



## SI Figure Legends and Figures

**Fig. S1. Role of NK cell ligands in NK cell-mediated cytotoxicity against HCC cells.** (A) HepG2/C3A cells expressing a non-silencing (NS) shRNA or shRNAs against *ULBP1*, 2, 5 or 6 were analyzed for the mRNA expression of the indicated NK cell ligands by RT-qPCR. Relative mRNA expression compared to NS shRNA expressing cells is shown. (B) HepG2/C3A cells expressing a NS shRNA or shRNAs against *ULBP1*, 2, 5 or 6 were analyzed for the indicated proteins by immunoblotting. (C) SK-HEP-1 cells expressing an empty vector or cDNAs for *ULBP1*, 2, 5 or 6 were analyzed for the mRNA expression of the indicated ULBP ligands by RT-qPCR. Relative mRNA expression compared to SK-HEP-1 cells expressing an empty vector is shown. (D) SK-HEP-1 cells expressing an empty vector or cDNAs for *ULBP1*, 2, 5 or 6 were analyzed for the indicated proteins by immunoblotting. Data are presented as mean  $\pm$  SEM; \* $p$ <0.05, \*\* $p$ <0.01, \*\*\* $p$ <0.001, and \*\*\*\* $p$ <0.0001.

**Fig. S2. Chemical genetic screen to identify the epigenetic factors that regulate NK cell ligand expression.** SK-HEP-1 cells were treated with two different concentrations of the indicated inhibitors as listed in Supplementary Table 2 for 48 hrs and the expression of the indicated NK cell ligands were analyzed by RT-qPCR. The relative mRNA expression compared to DMSO-treated cells is shown. Data are presented as mean  $\pm$  SEM; ns=not significant, \* $p$ <0.05, \*\* $p$ <0.01, \*\*\* $p$ <0.001, and \*\*\*\* $p$ <0.0001.

**Fig. S3. Chemical genetic screen to identify the epigenetic factors that regulate NK cell ligand expression.** SK-HEP-1 cells were treated with two different concentrations of the indicated inhibitors as listed in Supplementary Table 2 for 48 hrs and the expression of the indicated NK cell ligands were analyzed by RT-qPCR. The relative mRNA expression compared to DMSO-treated cells is shown. Data are presented as mean  $\pm$  SEM; ns=not significant, \* $p$ <0.05, \*\* $p$ <0.01, \*\*\* $p$ <0.001, and \*\*\*\* $p$ <0.0001.

**Fig. S4. Testing the deregulation of epigenetic regulators in HCC patient samples and role of epigenetic factors that regulate NK cell ligand expression.** (A) TCGA data for HCC were analyzed using the cBIO portal. All 360 patient samples containing information on mutations, copy number alterations, and mRNA expression were analyzed. The alterations in EZH2, SMYD2, BAZ2A/2B, and BRPF1, BRPF2 (BRD1), and BRPF3 is shown. (B) The indicated oncomine dataset was analyzed for the expression of the indicated epigenetic regulators. (C) PLC/PRF/5 cells were treated with two different concentrations of the indicated inhibitors as listed in Supplementary Table 2 for 48 hrs and the expression of the indicated NK cell ligands were analyzed by RT-qPCR. The relative mRNA expression for indicated NK cell ligands compared to DMSO-treated cells is shown. Data are presented as mean  $\pm$  SEM; ns=not significant, \* $p$ <0.05, \*\* $p$ <0.01, and \*\*\* $p$ <0.001.

**Fig. S5. EZH2 inhibition results in the re-expression of NK cell ligands and role of NK cell ligands in NK cell-mediated HCC cell eradication.** (A) SK-HEP-1 or PLC/PRF/5 cells were treated with either DMSO or the EZH2 inhibitor GSK126 (2  $\mu$ M) for 48 hrs. Immunoblotting for the H3K27TriMe histone mark and histone H3 was performed for DMSO- or GSK126-treated

cells. (B) SK-HEP-1 or PLC/PRF/5 cells were treated with either DMSO or the EZH2 inhibitor GSK126 (2  $\mu$ M) for 48 hrs. The mRNA expression of the indicated NK cell ligands was measured by RT-qPCR and compared to DMSO-treated cells. (C) SK-HEP-1 or PLC/PRF/5 cells expressing a non-silencing (NS) shRNA or *ULBP1*, *MICA* or *MICB* shRNAs were analyzed for *ULBP1*, *MICA* or *MICB* mRNA expression by RT-qPCR. The relative *ULBP1*, *MICA* or *MICB* mRNA expression compared to NS shRNA-expressing cells is shown. (D) SK-HEP-1 (left) or PLC/PRF/5 (right) cells expressing a non-silencing (NS) shRNA or *ULBP1*, *MICA* or *MICB* shRNAs were analyzed for the indicated proteins by immunoblotting. Data are presented as mean  $\pm$  SEM; \* $p$ <0.05, \*\* $p$ <0.01, \*\*\* $p$ <0.001, and \*\*\*\* $p$ <0.0001.

**Fig. S6. MICB in NK cell mediated HCC cell eradication and the role of DNA methylation in the regulation of ULBP1 and MICA.** (A) SK-HEP-1 or PLC/PRF/5 cells expressing either non-silencing (NS) or *MICB* shRNAs were treated with DMSO or the EZH2 inhibitor GSK343 (3  $\mu$ M) for 48 hrs and incubated with NK cells at a ratio of 20:1. (B) The 2-kb upstream promoter DNA sequences and the 5'UTR/CDS for *ULBP1* and *MICA* were downloaded from the UCSC genome browser and analyzed using EBI CpG plot to predict putative CpG islands. (C) Indicated HCC cell lines were analyzed by immunoblotting for DNA methyltransferase expression. Data are presented as mean  $\pm$  SEM; ns=not significant, \* $p$ <0.05, and \*\* $p$ <0.01.

**Fig. S7. Role of DNA methyltransferase 3A in EZH2-induced *ULBP1* silencing.** (A) SK-HEP-1 or PLC/PRF/5 cells expressing non-silencing (NS) shRNA, DNMT1, or DNMT3A shRNAs were analyzed for DNMT1 or DNMT3A expression using RT-qPCR. DNMT1 or DNMT3A mRNA expression relative to NS shRNA is shown. (B) SK-HEP-1 or PLC/PRF/5 cells

expressing non-silencing (NS) shRNA or DNMT1 or DNMT3A shRNAs were analyzed for DNMT1 or DNMT3A expression by immunoblotting. (C) SK-HEP-1 or PLC/PRF/5 cells were treated with DMSO or GSK343 (3  $\mu$ M) for 48 hrs and analyzed for DNMT1 recruitment on the *ULBP1* promoter or on *ACTINB* (control) using a chromatin immunoprecipitation (ChIP) assay. (D) SK-HEP-1 or PLC/PRF/5 cells expressing non-silencing (NS) shRNA or *DNMT1* shRNAs were analyzed for *ULBP1* mRNA expression by RT-qPCR. Relative *ULBP1* mRNA expression compared to NS shRNA-expressing cells are shown. Data are presented as mean  $\pm$  SEM; ns=not significant, \* $p$ <0.05, \*\* $p$ <0.01, \*\*\* $p$ <0.001, and \*\*\*\* $p$ <0.0001.

**A**

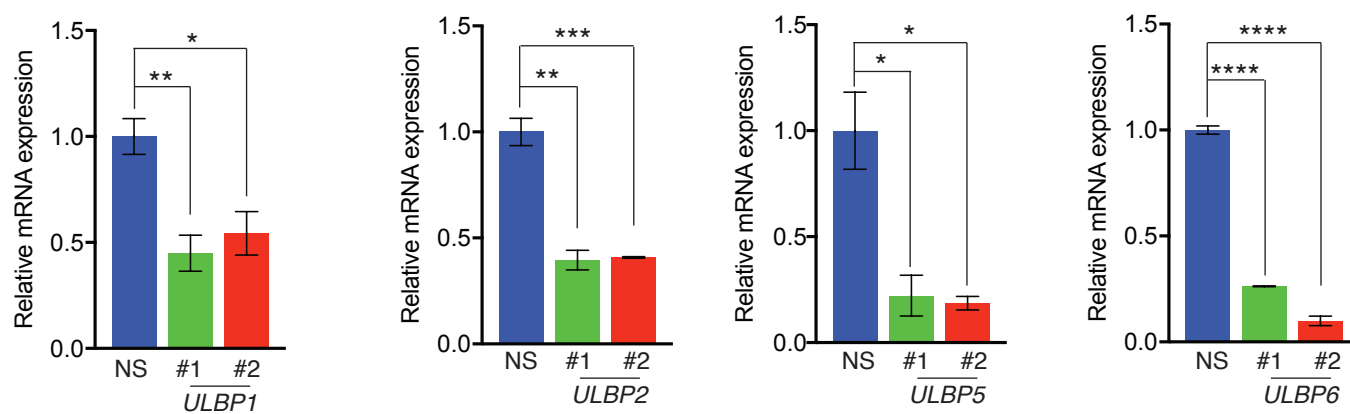

**B**

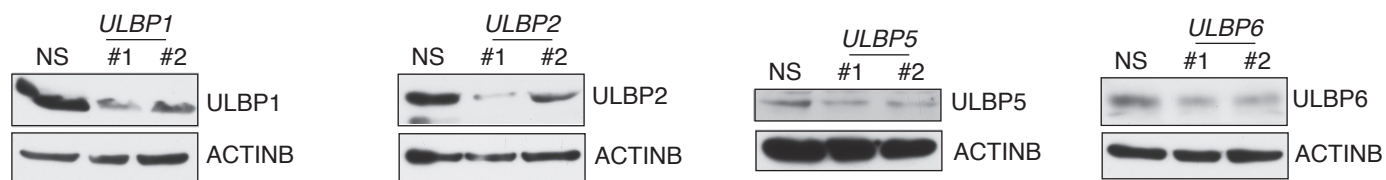

**C**

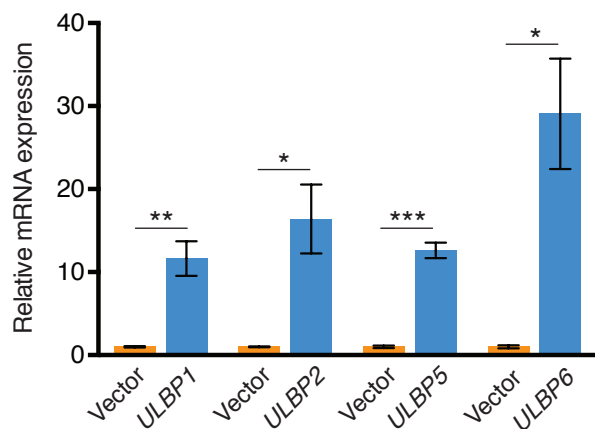

**D**

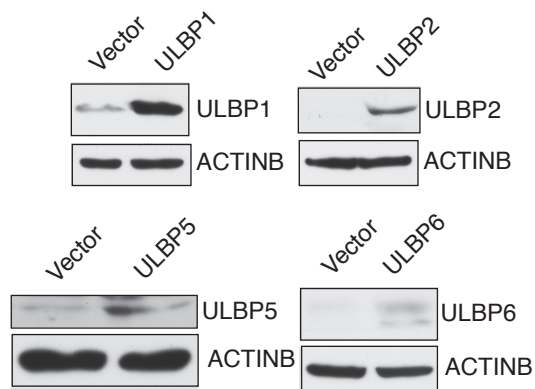

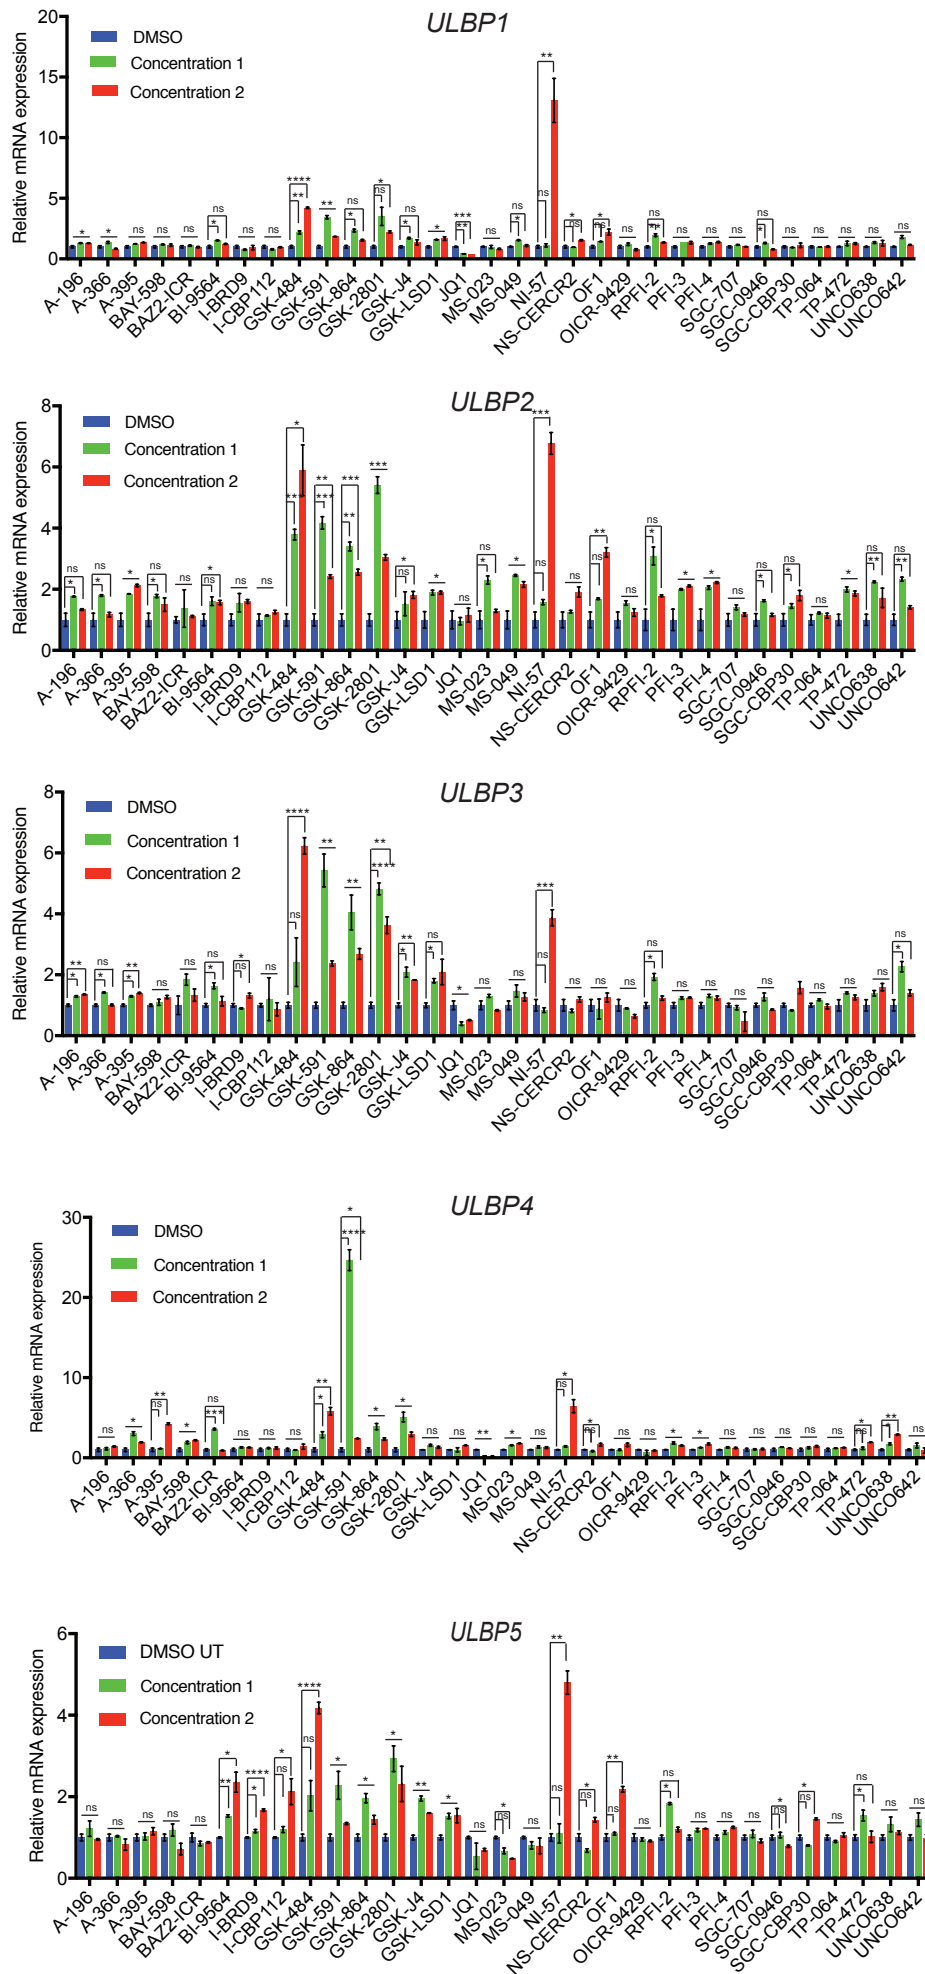

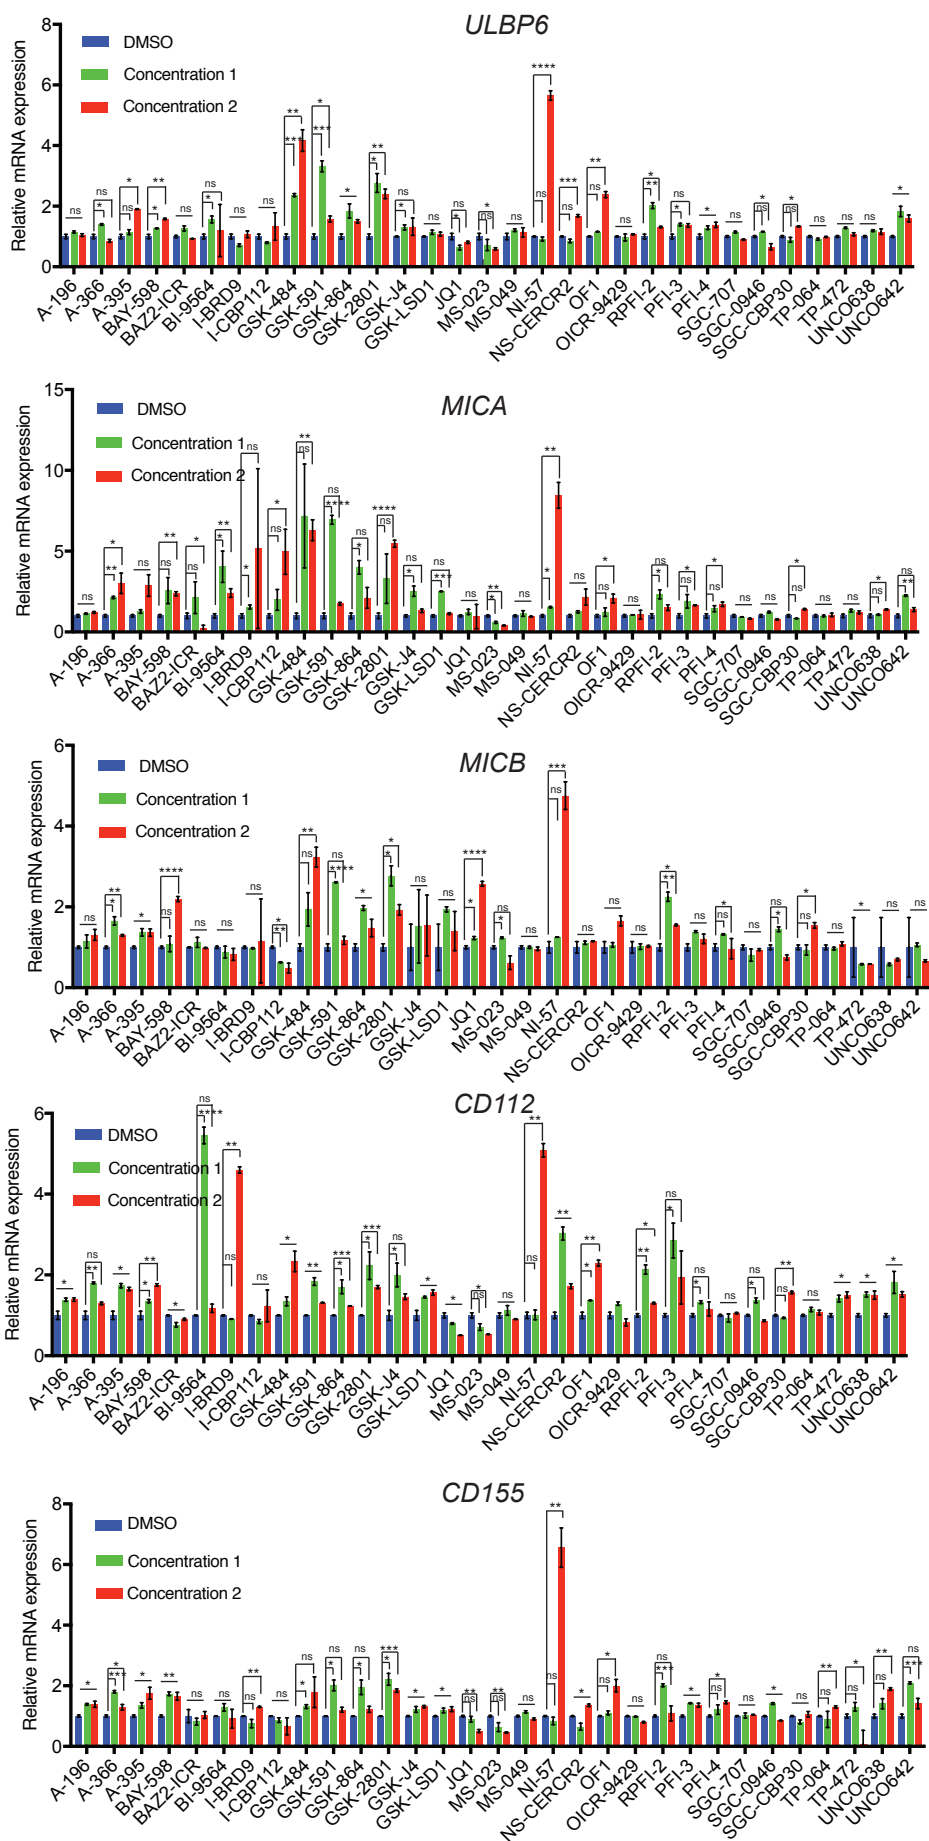

A

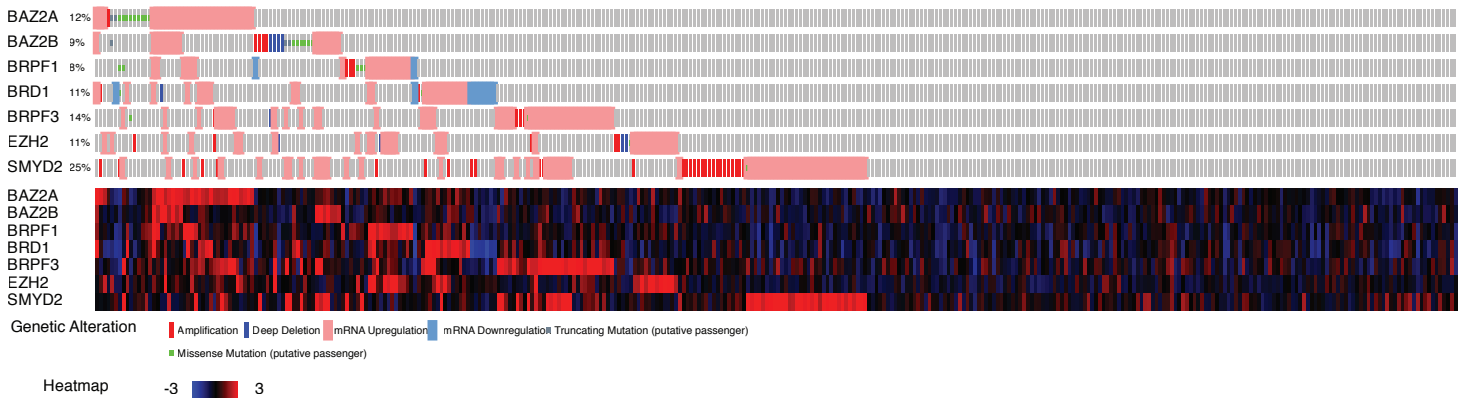

B

## Wurmbach Liver

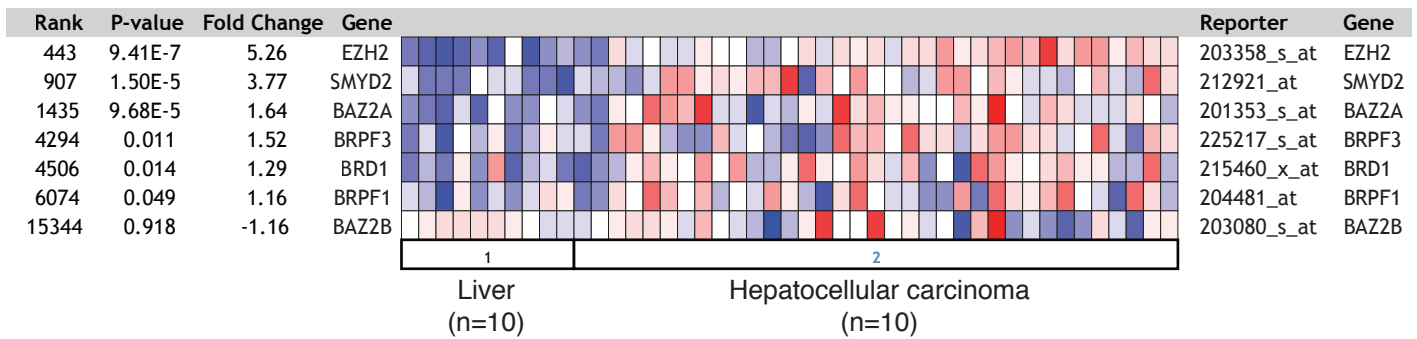

C

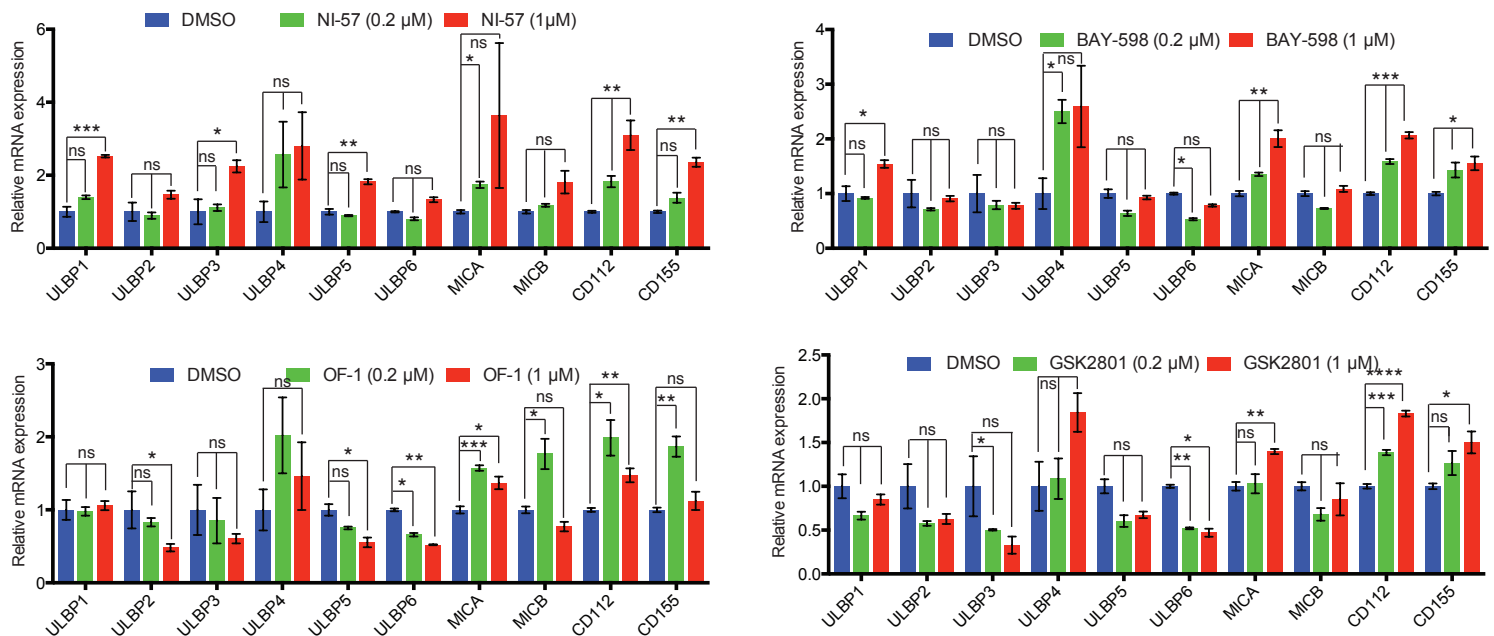



A

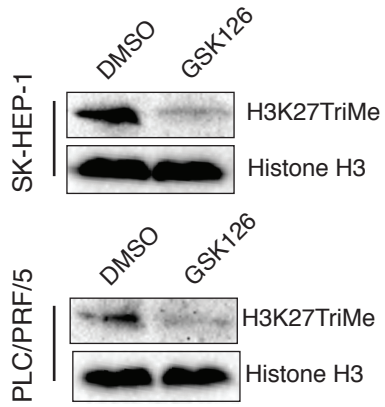

B

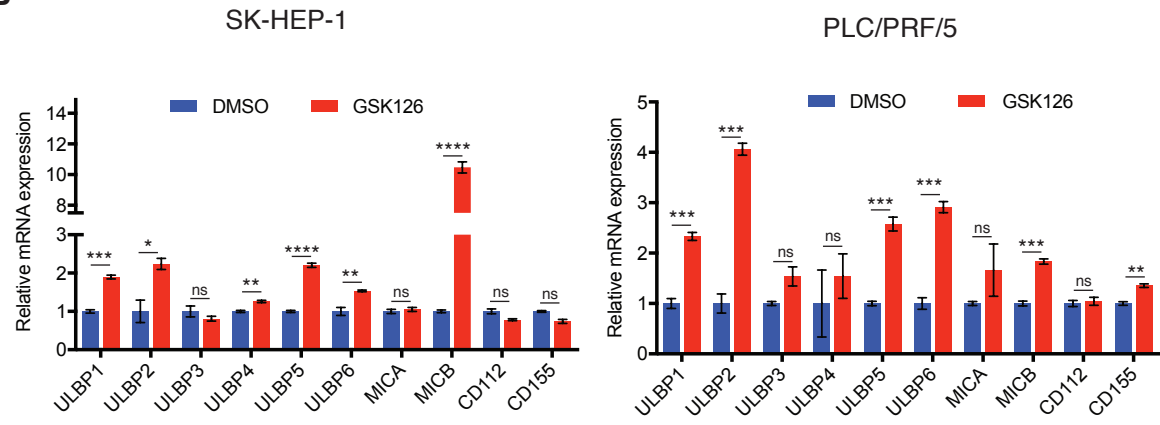

C

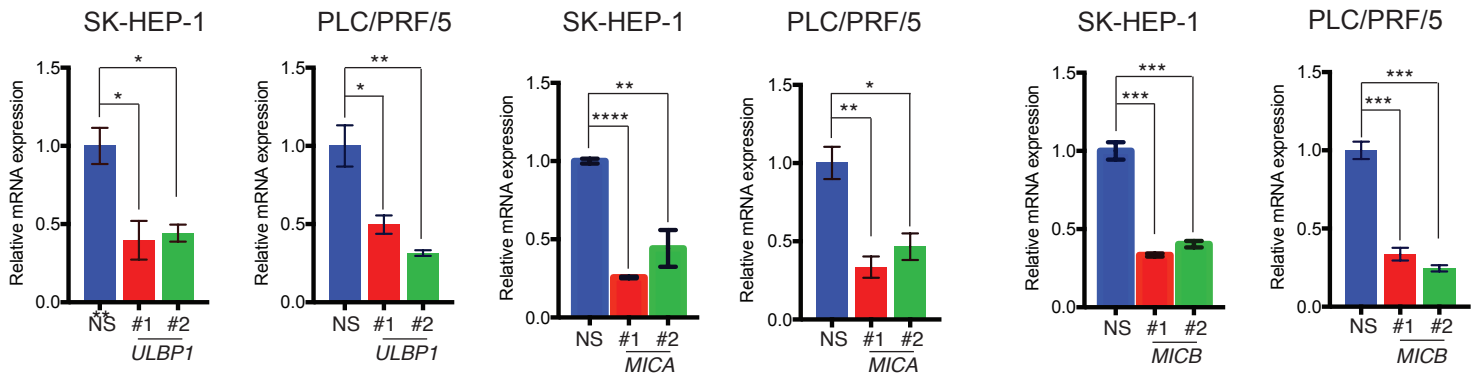

D

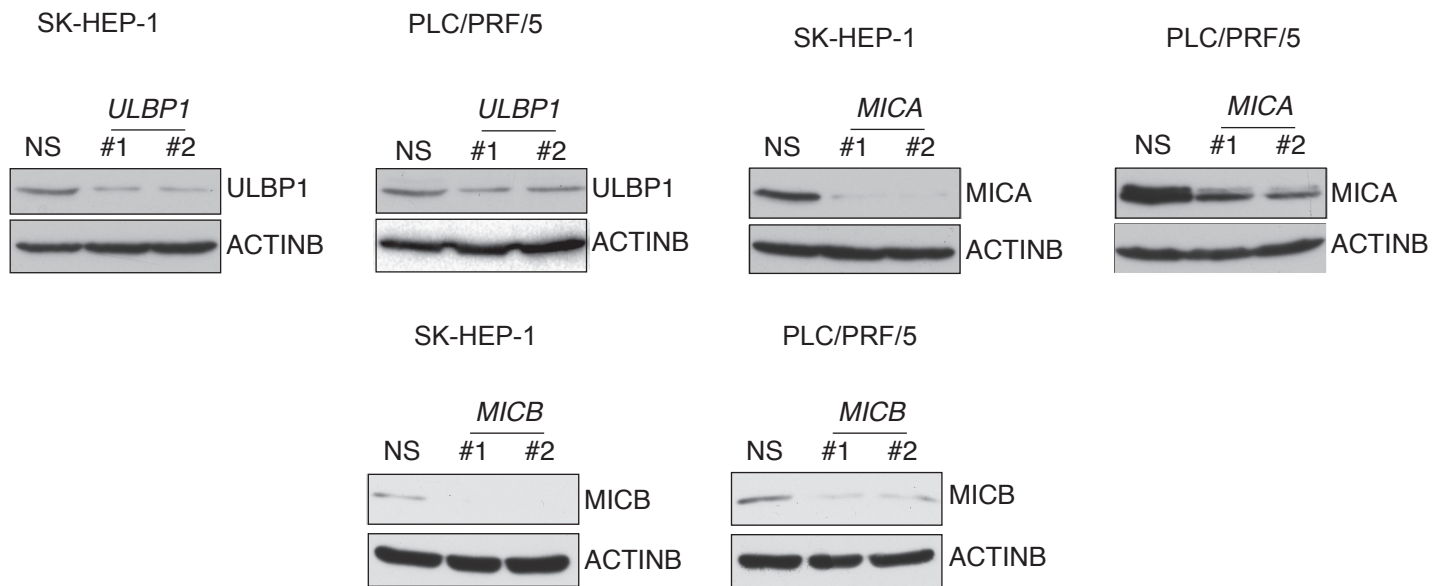

A

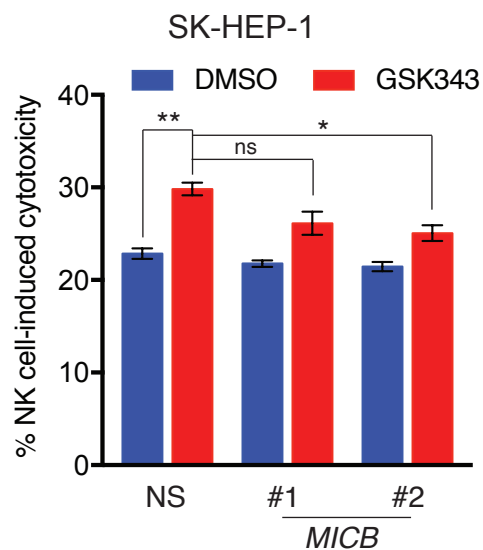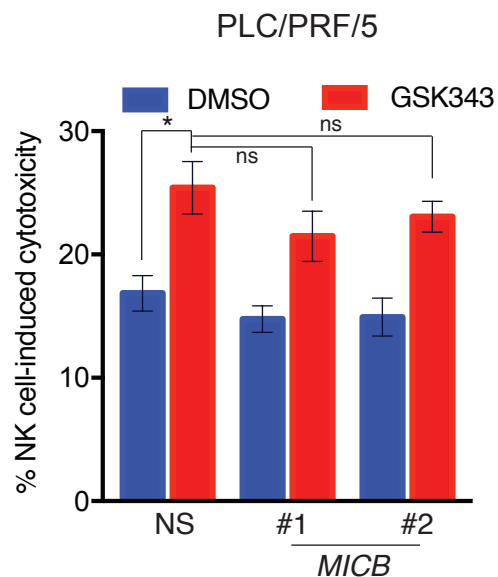

B

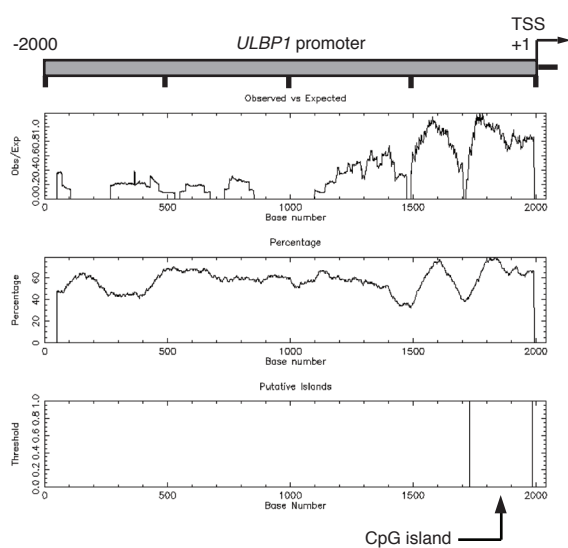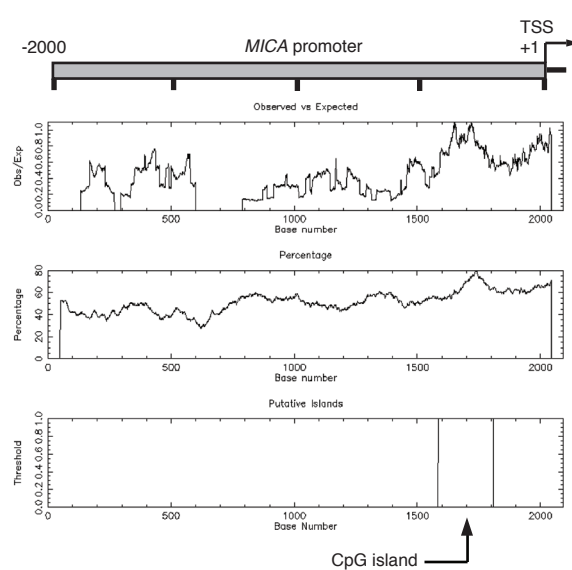

C

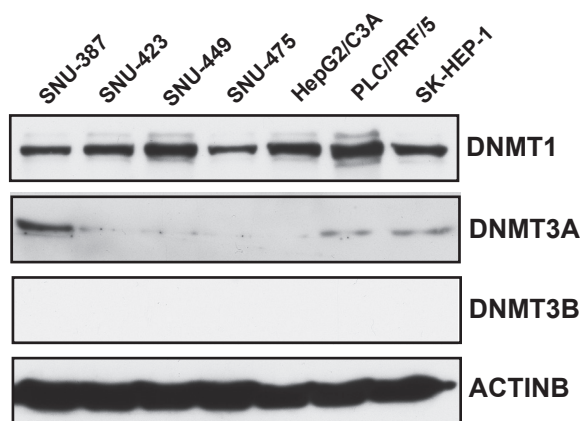

**A**

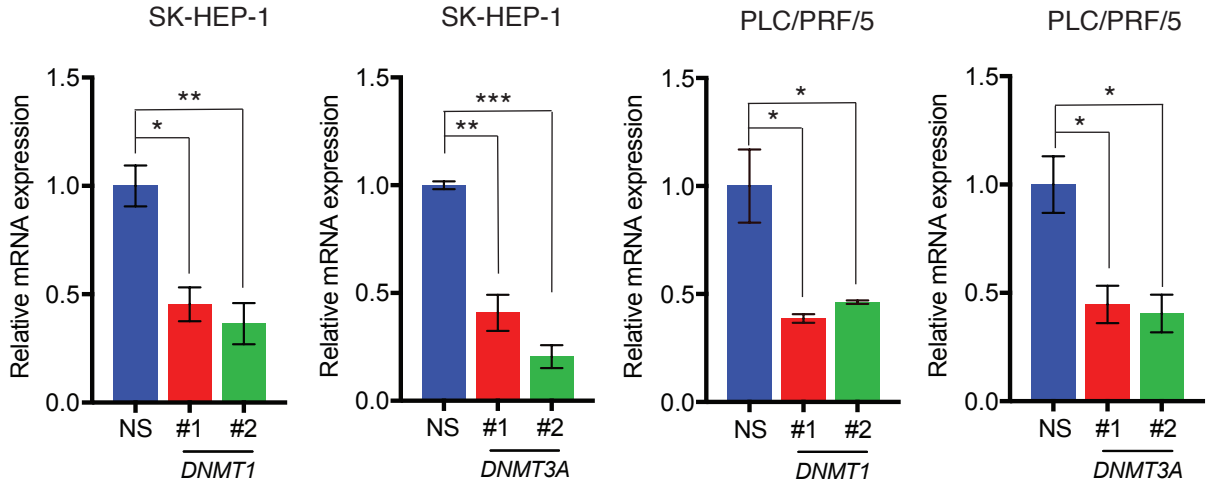

**B**

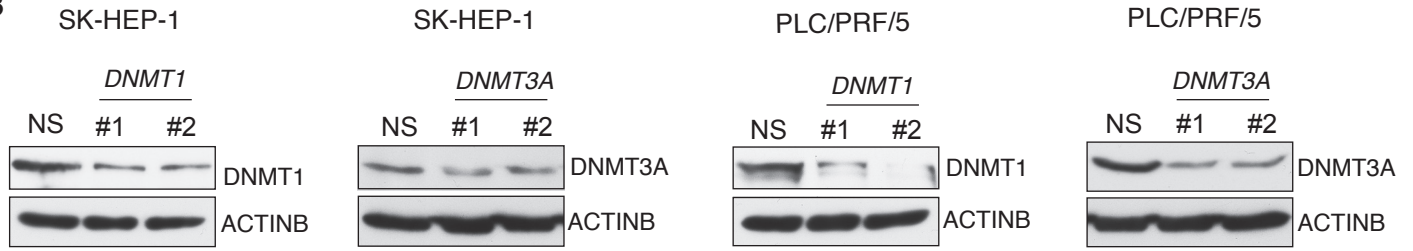

**C**

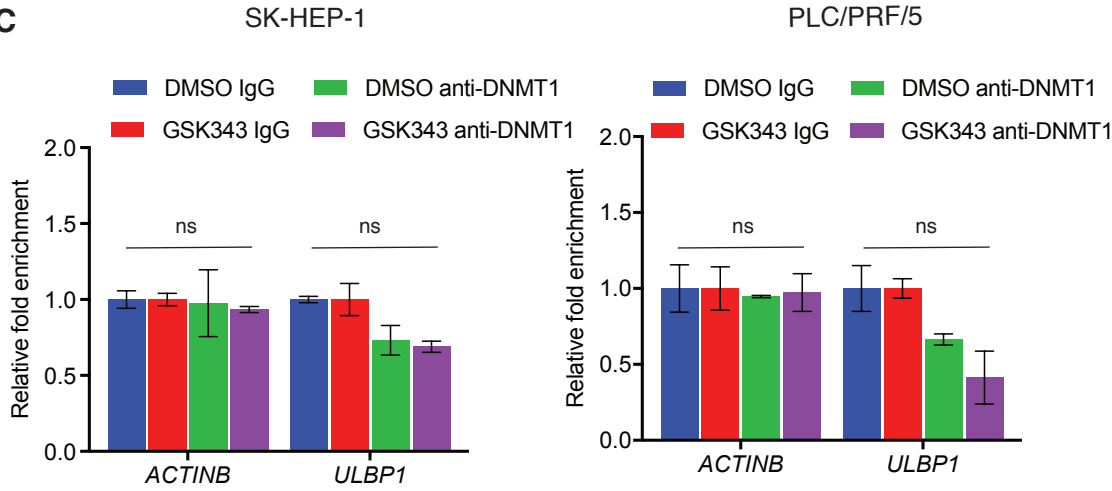

**D**

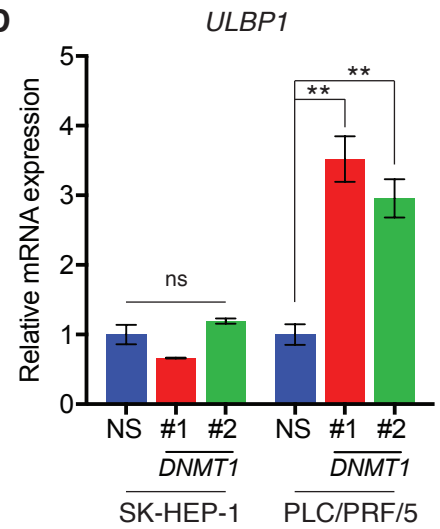

## SI Tables

**Table S1.** List of HCC panel cell lines used in this paper. Cell lines genotype and their tumor status.

| S. No. | Cell lines | Tumor Progression status | Tumor Grade     | Key genetic mutations (as provided by ATCC) |
|--------|------------|--------------------------|-----------------|---------------------------------------------|
| 1      | HepG2/C3A  | Primary                  | -               | <i>NRAS, CTNNB1</i>                         |
| 2      | PLC/PRF/5  | Primary                  | -               | <i>TP53, CDKN2A, STK11</i>                  |
| 3      | SK-HEP-1   | Metastasis, ascites      | -               | <i>CDKN2A, CDKN2a (p14), BRAF</i>           |
| 4      | SNU-387    | Primary                  | Grade IV/V      | <i>TP53, CDKN2A, CDKN2a (p14), NRAS</i>     |
| 5      | SNU-423    | Primary                  | Grade III/IV    | Not Determined                              |
| 6      | SNU-449    | Primary                  | Grade II-III/IV | <i>TP53, CDKN2A, CDKN2a (p14)</i>           |
| 7      | SNU-475    | Primary                  | Grade II-IV/V   | <i>TP53</i>                                 |

**Table S2:** List of inhibitors targeting indicated chromatin modifiers and the concentrations at which they were used in the chemical genetic screen.

| S.No. | Target protein        | Inhibitors  | Inhibitor concentrations ( $\mu\text{m}$ ) |
|-------|-----------------------|-------------|--------------------------------------------|
| 1     | BAZ2A/2B              | BAZ2-ICR    | 0.2 or 1                                   |
| 2     | BAZ2A/2B              | GSK2801     | 0.2 or 1                                   |
| 3     | BET family            | JQ1         | 0.2 or 1                                   |
| 4     | BRD9/7                | BI-9564     | 0.2 or 1                                   |
| 5     | BRD9/7                | TP-472      | 0.2 or 1                                   |
| 6     | BRD9                  | I-BRD9      | 0.2 or 1                                   |
| 7     | BRPF1/2/3; BRPF1B     | NI-57       | 0.2 or 1                                   |
| 8     | BRPF1/2/3; BRPF1B     | OF1         | 0.2 or 1                                   |
| 9     | BRPF1/2/3; BRPF1B     | PFI-4       | 0.2 or 1                                   |
| 10    | CECR2                 | NVS-CECR2-1 | 0.2 or 1                                   |
| 11    | CREBBP, EP300         | I-CBP112    | 0.2 or 1                                   |
| 12    | CREBBP, EP300         | SGC-CBP30   | 0.2 or 1                                   |
| 13    | DOT1L                 | SGC0946     | 0.2 or 1                                   |
| 14    | EED                   | A-395       | 0.2 or 1                                   |
| 15    | EZH2/H1               | GSK343      | 0.6 or 3                                   |
| 16    | G9a (EHMT2)/GLP       | A-366       | 0.2 or 1                                   |
| 17    | G9a (EHMT2)/GLP       | UNC0638     | 0.2 or 1                                   |
| 18    | G9a (EHMT2)/GLP       | UNCO642     | 0.2 or 1                                   |
| 19    | IDH1 mutant           | GSK864      | 0.2 or 1                                   |
| 20    | JMJD3/UTX (KDM6A/B)   | GSK-J4      | 1 or 5                                     |
| 21    | LSD1 (KDM1A)          | GSK-LSD1    | 0.2 or 1                                   |
| 22    | PAD4 (PADI4)          | GSK484      | 2 or 10                                    |
| 23    | PRMT Type I           | MS023       | 0.2 or 1                                   |
| 24    | PRMT3                 | SGC707      | 0.2 or 1                                   |
| 25    | PRMT4                 | TP-064      | 0.2 or 1                                   |
| 26    | PRMT4/6               | MS049       | 1 or 5                                     |
| 27    | PRMT5                 | GSK591      | 0.2 or 1                                   |
| 28    | SETD7                 | (R)-PFI-2   | 0.2 or 1                                   |
| 29    | SMARCA2/4, PB1        | PFI-3       | 0.2 or 1                                   |
| 30    | SMYD2                 | BAY-598     | 0.2 or 1                                   |
| 31    | SUV420H1/H2 (KMT5B/C) | A-196       | 0.2 or 1                                   |
| 32    | WDR5                  | OICR-9429   | 0.6 or 3                                   |

**Table S3:** Table showing list of chromatin modifier inhibitors used in this study and their effect on NK cell ligands expression in SK-HEP-1 cells. (+) mRNA expression increased more than 1.5 fold; (-) mRNA expression less than 1.5 fold; low, low dose of inhibitor used; High, High dose of inhibitor used. The concentrations of each drug used for the experiment listed in Table S2.

| S. NO | Target               | Inhibitor       | ULBP1 |      | ULBP2 |      | ULBP3 |      | ULBP4 |      | ULBP5 |      | ULBP6 |      | MICA |      | MICB |      | CD112 |      | CD155 |      |
|-------|----------------------|-----------------|-------|------|-------|------|-------|------|-------|------|-------|------|-------|------|------|------|------|------|-------|------|-------|------|
|       |                      |                 | Low   | High | Low  | High | Low  | High | Low   | High | Low   | High |
| 1     | BAZ2A/2B             | BAZ2-ICR        | -     | -    | -     | -    | +     | -    | +     | -    | -     | -    | -     | -    | +    | -    | -    | -    | -     | -    | -     | -    |
| 2     | BAZ2A/2B             | GSK2801         | +     | +    | +     | +    | +     | +    | +     | +    | +     | +    | +     | +    | +    | +    | +    | +    | +     | +    | +     | +    |
| 3     | BET family           | JQ1             | -     | -    | -     | -    | -     | -    | -     | -    | -     | -    | -     | -    | -    | -    | -    | +    | -     | -    | -     | -    |
| 4     | BRD9/7               | BI-9564         | -     | -    | +     | +    | +     | -    | -     | -    | +     | +    | +     | -    | +    | +    | -    | -    | +     | -    | +     | -    |
| 5     | BRD9/7               | TP-472          | -     | -    | -     | +    | -     | -    | -     | +    | +     | -    | -     | -    | -    | -    | -    | -    | -     | +    | -     | -    |
| 6     | BRD9                 | I-BRD9          | -     | -    | -     | +    | -     | -    | -     | -    | -     | +    | -     | -    | +    | +    | -    | -    | -     | +    | -     | -    |
| 7     | BRPF1/2/3;<br>BRPF1B | NI-57           | -     | +    | +     | +    | -     | +    | -     | +    | -     | +    | -     | +    | -    | +    | -    | +    | -     | +    | -     | +    |
| 8     | BRPF1/2/3;<br>BRPF1B | OF1             | -     | +    | +     | +    | -     | -    | -     | +    | -     | +    | -     | +    | -    | +    | -    | +    | -     | +    | -     | +    |
| 9     | BRPF1/2/3;<br>BRPF1B | PFI-4           | -     | -    | +     | +    | -     | -    | -     | -    | -     | -    | -     | -    | -    | +    | -    | -    | -     | -    | -     | -    |
| 10    | CECR2                | NVS-<br>CECR2-1 | -     | +    | -     | +    | -     | -    | -     | +    | -     | -    | -     | +    | -    | +    | -    | -    | +     | +    | -     | +    |
| 11    | CREBBP, EP300        | I-CBP112        | -     | -    | -     | -    | -     | -    | -     | -    | -     | +    | -     | -    | +    | +    | -    | -    | -     | -    | -     | -    |
| 12    | CREBBP, EP300        | SGC-<br>CBP30   | -     | -    | -     | +    | -     | +    | -     | -    | -     | -    | -     | -    | -    | -    | -    | -    | -     | +    | -     | -    |
| 13    | DOT1L                | SGC0946         | -     | -    | +     | -    | -     | -    | -     | -    | -     | -    | -     | -    | -    | -    | -    | +    | -     | -    | -     | -    |
| 14    | EED                  | A-395           | -     | -    | +     | +    | -     | -    | -     | +    | -     | -    | -     | +    | -    | +    | -    | -    | +     | +    | -     | -    |
| 15    | EZH2/H1              | GSK126          | -     | +    | +     | +    | -     | -    | +     | -    | -     | +    | -     | +    | -    | -    | +    | +    | -     | -    | -     | +    |
| 16    | EZH2/H1              | GSK343          | -     | +    | -     | +    | -     | +    | -     | +    | -     | +    | -     | +    | +    | +    | -    | +    | -     | +    | -     | +    |
| 17    | G9a<br>(EHMT2)/GLP   | A-366           | -     | -    | +     | -    | -     | -    | +     | +    | -     | -    | -     | -    | +    | +    | +    | -    | -     | -    | -     | -    |
| 18    | G9a<br>(EHMT2)/GLP   | UNC0638         | -     | -    | +     | +    | -     | +    | +     | +    | -     | -    | -     | -    | -    | -    | -    | -    | +     | -    | -     | -    |



**Table S4:** Table showing list of chromatin modifier inhibitors used in this study and their effect on NK cell ligands expression in PLC/PRF/5 cells. (+) mRNA expression increased more than 1.5 fold; (-) mRNA expression less than 1.5 fold; low, low dose of inhibitor used; High, High dose of inhibitor used. The concentrations of each drug used for the experiment listed in Supplementary Table 2.

| S. No. | Target               | Inhibitor | ULBP1 |      | ULBP2 |      | ULBP3 |      | ULBP4 |      | ULBP5 |      | ULBP6 |      | MICA |      | MICB |      | CD112 |      | CD155 |      |   |
|--------|----------------------|-----------|-------|------|-------|------|-------|------|-------|------|-------|------|-------|------|------|------|------|------|-------|------|-------|------|---|
|        |                      |           | Low   | High | Low  | High | Low  | High | Low   | High | Low   | High |   |
| 1      | BAZ2A/2B             | GSK2801   | -     | -    | -     | -    | -     | -    | -     | +    | -     | -    | -     | -    | -    | -    | -    | -    | -     | -    | +     | -    | + |
| 2      | BRPF1/2/3;<br>BRPF1B | NI-57     | -     | +    | -     | -    | -     | +    | +     | +    | -     | +    | -     | -    | +    | +    | -    | +    | +     | +    | +     | -    | + |
| 3      | BRPF1/2/3;<br>BRPF1B | OF1       | -     | -    | -     | -    | -     | -    | +     | -    | -     | -    | -     | -    | +    | -    | +    | -    | +     | +    | -     | +    | - |
| 4      | EZH2/H1              | GSK126    | +     | +    | +     | +    | -     | +    | +     | +    | +     | +    | +     | +    | +    | +    | +    | +    | +     | +    | -     | +    | - |
| 5      | EZH2/H1              | GSK343    | -     | +    | +     | +    | -     | -    | -     | +    | +     | +    | -     | +    | -    | +    | -    | +    | -     | +    | -     | -    | - |
| 6      | SMYD2                | BAY-598   | -     | -    | +     | -    | -     | -    | +     | +    | -     | -    | -     | +    | +    | +    | -    | +    | -     | +    | -     | +    | - |



**Table S5: Primer sequences, clone IDs, catalog numbers, antibodies, and chemical inhibitors used in this study.** Primers were used for qRT-PCR analysis, ChIP experiments, and cloning. The shRNAs used herein were obtained from Open Biosystems; clone IDs and catalog numbers are listed. The antibodies were used for immunoblot analyses. The source and concentrations of chemical inhibitors used for drug treatment experiments are summarized.

| Application   | Gene symbol        | Forward primer (5'-3')        | Reverse primer (5'-3')           |                                 |
|---------------|--------------------|-------------------------------|----------------------------------|---------------------------------|
| RT-qPCR       | <i>CD112</i>       | ACGGTCACCTGCAAAGTGG           | ACGGCCGAGGTACCAGTTGT             |                                 |
|               | <i>CD155</i>       | TGTCCCGTAACGCCATCATC          | CCAAAGGACCTCACGGGAAC             |                                 |
|               | <i>DNMT1</i>       | CAGCAACGGGCAGATGTTTC          | CGGAGGGGGCTTTGTAGATG             |                                 |
|               | <i>DNMT3a</i>      | CTACGCACCACCTCCACCAG          | CAATGTTCCGGCACTTCTGC             |                                 |
|               | <i>EZH2</i>        | TCCCGCTGAGGATGTGGATA          | GGGCACGAACTGCACAAGG              |                                 |
|               | <i>MICA</i>        | CCTGCAATCCCAGCACTTTG          | ATTCACCACCAAGCCCCTCT             |                                 |
|               | <i>MICB</i>        | CACGTTCCGCCCTTTGTTCCAG        | GGAGGCAGAGGTTGCAGTGA             |                                 |
|               | <i>ULBP1</i>       | CCACCAGGACTGGCAAAGTGG         | ATTGGGAGGCAAGGTGGTA              |                                 |
|               | <i>ULBP2</i>       | CAGGCACAACCCAAGTCCAGG         | GCCAGACAGAAGGGCGAGTT             |                                 |
|               | <i>ULBP3</i>       | CCTCGCGATTCTCCGTACC           | GCCCCACCTCTCTCAGCAT              |                                 |
|               | <i>ULBP4</i>       | TCGCCACCAATGGAGAGAAA          | ATTGCCTCCAGTGCCTTAA              |                                 |
|               | <i>ULBP5</i>       | GCTTCTGCTCCTGCTGTCCA          | GGGACTGACGGGTGTGACTG             |                                 |
|               | <i>ULBP6</i>       | GCCATGTCCTCAGGCACAAC          | TCAGATGCCAGGGAGGATGA             |                                 |
|               | Cloning            | <i>ULBP1</i>                  | GCAGTCTAGAATGGCAGCGCCGCCAGC      | GCATCTCGAGTCATCTGCCAGCTAGAATGAA |
|               |                    | <i>ULBP2</i>                  | GCAGTCTAGAATGGCAGCAGCCGCCGCT     | GCATCTCGAGTCAGATGCCAGGGAGGATGA  |
| <i>ULBP5</i>  |                    | GCAGTCTAGAATGGCAGCGCCGCCAGCC  | GCATCTCGAGTCAAGATATGGAGACCTGAGTG |                                 |
| <i>ULBP6</i>  |                    | GCAGTCTAGAATGGCAGCAGCCGCCATCC | GCATCTCGAGTCAGATGCCAGGGAGGATGAA  |                                 |
| ChIP primers  | <i>MICA</i>        | GTGGCATGATCTCGGCTCAC          | TGGTGGTGGGTGCCTGTAGT             |                                 |
|               | <i>ULBP1</i>       | CTGGGCCACCAAGCTATTC           | CCTCTGTCCAGGAGGGGCTA             |                                 |
| MeDIP primers | <i>ULBP1</i>       | GAGTTGCGTCAGCCAGGCC           | TATAAAGCTGCCAGCCCCGG             |                                 |
| shRNAs        | <b>Gene symbol</b> | <b>Clone ID</b>               | <b>Catalog number</b>            |                                 |
|               | <i>DNMT1</i>       | TRCN0000021892                | RHS3979-9589300                  |                                 |
|               |                    | TRCN0000021893                | RHS3979-9589301                  |                                 |
|               | <i>DNMT3a</i>      | TRCN0000035755                | RHS3979-9603163                  |                                 |
|               |                    | TRCN0000035757                | RHS3979-9603165                  |                                 |
|               | <i>MICA</i>        | V3LHS_354146                  | RHS4430-101105008                |                                 |
|               |                    | V3LHS_354144                  | RHS4430-101106880                |                                 |
|               | <i>MICB</i>        | TRCN0000061333                | RHS3979-9628517                  |                                 |
|               |                    | TRCN0000061336                | RHS3979-9628520                  |                                 |
|               | <i>EZH2</i>        | TRCN0000040073                | RHS3979-9607462                  |                                 |
|               |                    | TRCN0000010475                | RHS3979-9630938                  |                                 |
|               | <i>ULBP1</i>       | V3LHS_412149                  | RHS4430-101103656                |                                 |
|               |                    | V3LHS_384642                  | RHS4430-101106707                |                                 |
|               | <i>ULBP2</i>       | V3LHS_408382                  | RHS4430-101063492                |                                 |
|               |                    | V3LHS_408380                  | RHS4430-101064935                |                                 |
|               | <i>ULBP5</i>       | V3LHS_362960                  | RHS4430-101162352                |                                 |
|               |                    | V3LHS_362957                  | RHS4430-101166818                |                                 |
|               | <i>ULBP6</i>       | V3LHS_311159                  | RHS4430-101128069                |                                 |

|                |                       |                          |                   |
|----------------|-----------------------|--------------------------|-------------------|
|                |                       | V3LHS_311158             | RHS4430-101131137 |
|                |                       | V3LHS_311161             | RHS4430-101132422 |
| Immunoblotting | <b>Protein symbol</b> | <b>Antibody source</b>   | <b>Dilution</b>   |
|                | Actin                 | Cell signaling           | 1:5000            |
|                | DNMT1                 | Active Motif             | 1:1000            |
|                | DNMT3A                | Active Motif             | 1:1000            |
|                | DNMT3A                | Santa Cruz Biotechnology | 1:200             |
|                | DNMT3B                | Santa Cruz Biotechnology | 1:200             |
|                | MICA/B                | Santa Cruz Biotechnology | 1:200             |
|                | MICB                  | Santa Cruz Biotechnology | 1:200             |
|                | EZH2                  | Cell signaling           | 1:2000            |
|                | Histone H3            | Cell signaling           | 1:2000            |
|                | H3K27TriMe            | Cell signaling           | 1:2000            |
|                | ULBP1                 | Santa Cruz Biotechnology | 1:250             |
|                | ULBP2                 | VWR International        | 1:1000            |
|                | ULBP5                 | Novus Biologicals        | 1:1000            |
|                | ULBP2/5/6             | Novus Biologicals        | 1:250             |
